# Supplementary material
Source: MDPI journal article supplement (https://www.mdpi.com/2076-3417/12/20/10291)
Supplement: s1 [file s1]

## Supplementary Materials

### Effect of nitrogen and phosphorus distribution in overlying water and sediment of major rivers in Changchun Urban on water quality

#### Table title list

**Table S1.** Summary for the measurement results of ammonia nitrogen ( $\text{NH}_3\text{-N}$ ), total nitrogen (TN) and total phosphorus (TP) in standard solutions

**Table S2.** Measurement results of certified reference material GBW07309

**Table S3.** Content of ammonia nitrogen ( $\text{NH}_3\text{-N}$ ), total nitrogen (TN) and total phosphorus (TP) in overlying water and sediment of six rivers in Changchun Urban

**Table S4.** Other physicochemical properties of overlying water and sediment in six rivers of Changchun Urban

**Table S5.** Classification of samples based on five discriminant functions

**Table S6.** The eigenvalue of canonical discriminate function

**Table S7.** Classification standard of ammonia nitrogen ( $\text{NH}_3\text{-N}$ ), total nitrogen (TN) and total phosphorus (TP) for surface water in the environmental quality standard GB3838-2002 of the People's Republic of China

**Table S1.** Summary for the measurement results of ammonia nitrogen (NH<sub>3</sub>-N), total nitrogen (TN) and total phosphorus (TP) in standard solutions

| Standard solution  | Concentration (mg/L)                            | Linear equation  | R      |
|--------------------|-------------------------------------------------|------------------|--------|
| NH <sub>3</sub> -N | 0.000, 0.250, 0.500, 0.750, 1.000, 1.250, 1.500 | $y=1.923x-0.004$ | 0.9999 |
| TN                 | 0.000, 0.500, 1.000, 1.500, 2.000, 2.500, 3.000 | $y=3.901x-0.072$ | 0.9993 |
| TP                 | 0.000, 0.100, 0.200, 0.300, 0.400, 0.500, 0.600 | $y=0.676x-0.006$ | 0.9997 |

R: correlation coefficient.

**Table S2.** Measurement results of certified reference material GBW07309

| GBW07309           | N     | P     |
|--------------------|-------|-------|
| $C_1$ (mg/g)       | 0.422 | 0.685 |
| $C_2$ (mg/g)       | 0.435 | 0.676 |
| $C_3$ (mg/g)       | 0.419 | 0.692 |
| $C_4$ (mg/g)       | 0.425 | 0.690 |
| $C_5$ (mg/g)       | 0.413 | 0.683 |
| $\bar{C}_i$ (mg/g) | 0.423 | 0.685 |
| $C_s$ (mg/g)       | 0.440 | 0.670 |
| $\Delta \lg C$ (%) | 1.73  | 0.97  |
| RSD (%)            | 4.75  | 2.71  |
| DL (mg/L)          | 0.013 | 0.007 |

$C_1$ ,  $C_2$ ,  $C_3$  and  $C_4$ : the 1st, 2nd, 3rd and 4th measured value, respectively;  $\bar{C}_i$ : the average value of four measurements;  $C_s$ : national standard value;  $\Delta \lg C$ : logarithmic deviation;  $\Delta \lg C = |\lg \bar{C}_i - \lg C_s|$ ; RSD: relative standard deviation;  $\text{RSD} = \frac{\sqrt{\frac{\sum_{i=1}^n (C_i - C_s)^2}{n-1}}}{C_s} \times 100\%$ , where  $n=5$  was the number of parallel experiments; DL: detection limit.

**Table S3.** Content of ammonia nitrogen (NH<sub>3</sub>-N), total nitrogen (TN) and total phosphorus (TP) in overlying water and sediment of six rivers in Changchun Urban

| Sample | Water                        |              |              | Sediment                     |              |              | River          |
|--------|------------------------------|--------------|--------------|------------------------------|--------------|--------------|----------------|
|        | NH <sub>3</sub> -N<br>(mg/L) | TN<br>(mg/L) | TP<br>(mg/L) | NH <sub>3</sub> -N<br>(mg/g) | TN<br>(mg/L) | TP<br>(mg/g) |                |
| 1      | 0.10                         | 1.02         | 0.05         | 1.48                         | 3.97         | 58.93        | Chuan Lake     |
| 2      | 0.89                         | 1.46         | 0.05         | 1.96                         | 4.69         | 55.32        |                |
| 3      | 11.31                        | 15.21        | 2.84         | 1.49                         | 3.51         | 81.96        |                |
| 4      | 0.80                         | 1.07         | 0.08         | 1.60                         | 3.71         | 70.00        |                |
| 5      | 0.12                         | 0.88         | 0.05         | 0.52                         | 4.34         | 17.38        |                |
| 6      | 0.53                         | 1.11         | 0.06         | 1.24                         | 3.26         | 45.51        |                |
| 7      | 13.96                        | 30.80        | 3.47         | 0.98                         | 4.27         | 63.45        |                |
| 8      | 0.46                         | 1.18         | 0.07         | 1.56                         | 3.24         | 60.06        |                |
| 9      | 0.70                         | 5.30         | 0.07         | 2.63                         | 3.82         | 52.83        |                |
| 10     | 2.73                         | 11.17        | 0.06         | 2.49                         | 2.61         | 27.32        |                |
| 11     | 8.21                         | 17.81        | 0.29         | 2.42                         | 2.58         | 28.67        |                |
| 12     | 0.34                         | 1.21         | 0.05         | 1.17                         | 3.21         | 44.33        |                |
| 13     | 4.39                         | 9.55         | 0.64         | 1.58                         | 3.70         | 47.57        |                |
| 1      | 11.21                        | 16.65        | 0.12         | 0.41                         | 2.07         | 38.83        | Jingshui River |
| 2      | 19.54                        | 20.05        | 0.24         | 1.72                         | 3.61         | 65.93        |                |
| 3      | 10.24                        | 10.51        | 0.29         | 2.46                         | 4.23         | 99.35        |                |
| 4      | 1.90                         | 5.48         | 0.15         | 1.61                         | 2.63         | 91.90        |                |
| 5      | 2.35                         | 7.45         | 0.18         | 1.14                         | 2.00         | 56.67        |                |
| 6      | 2.35                         | 9.08         | 0.2          | 0.69                         | 1.76         | 37.03        |                |
| 7      | 10.61                        | 11.53        | 0.2          | 1.34                         | 2.65         | 64.95        |                |
| 8      | 10.83                        | 12.00        | 0.28         | 1.69                         | 3.69         | 74.74        |                |
| 9      | 10.84                        | 15.16        | 0.13         | 1.19                         | 3.87         | 63.45        |                |
| 10     | 7.93                         | 10.37        | 0.26         | 2.14                         | 4.13         | 94.38        |                |
| 1      | 0.16                         | 1.36         | 0.17         | 0.31                         | 1.43         | 15.12        | West Lake      |
| 2      | 5.98                         | 9.97         | 0.16         | 0.43                         | 2.08         | 22.35        |                |
| 3      | 6.05                         | 10.22        | 0.13         | 0.28                         | 1.76         | 32.28        |                |
| 4      | 0.85                         | 1.90         | 0.14         | 0.25                         | 1.16         | 47.41        |                |
| 5      | 3.61                         | 7.42         | 0.28         | 0.25                         | 1.60         | 79.71        |                |
| 6      | 7.84                         | 12.67        | 0.29         | 3.46                         | 4.68         | 88.96        |                |
| 7      | 10.38                        | 14.20        | 0.14         | 3.51                         | 3.92         | 152.87       |                |
| 8      | 11.27                        | 14.82        | 0.12         | 0.75                         | 2.19         | 138.87       |                |
| 9      | 12.01                        | 14.96        | 0.13         | 4.10                         | 4.49         | 138.64       |                |
| 10     | 6.27                         | 8.80         | 0.13         | 3.56                         | 3.71         | 121.03       |                |
| 1      | 1.46                         | 10.51        | 0.22         | 0.29                         | 5.25         | 48.54        | Xinkai River   |
| 2      | 1.33                         | 9.44         | 0.16         | 0.24                         | 6.50         | 68.87        |                |
| 3      | 0.98                         | 7.45         | 0.16         | 0.24                         | 6.08         | 59.16        |                |
| 4      | 8.54                         | 13.35        | 2.97         | 0.25                         | 3.18         | 40.86        |                |

|    |       |       |      |       |       |        |                |
|----|-------|-------|------|-------|-------|--------|----------------|
| 5  | 16.09 | 24.90 | 5.52 | 3.63  | 10.26 | 64.12  |                |
| 6  | 9.50  | 18.31 | 2.98 | 3.65  | 9.92  | 50.12  |                |
| 7  | 3.58  | 8.72  | 0.44 | 0.19  | 2.87  | 77.45  |                |
| 8  | 4.07  | 7.20  | 0.33 | 0.29  | 3.90  | 104.09 |                |
| 9  | 4.31  | 7.57  | 0.53 | 0.35  | 3.71  | 48.54  |                |
| 10 | 3.88  | 10.77 | 0.6  | 0.18  | 5.57  | 29.80  |                |
| 11 | 3.38  | 10.54 | 0.51 | 0.20  | 7.07  | 48.09  |                |
| 12 | 3.13  | 8.15  | 0.45 | 0.52  | 6.50  | 70.90  |                |
| 13 | 3.09  | 7.29  | 0.69 | 1.10  | 4.73  | 60.96  |                |
| 14 | 2.44  | 6.60  | 0.79 | 2.29  | 5.39  | 67.29  |                |
| 15 | 3.58  | 9.92  | 0.70 | 1.94  | 6.55  | 89.42  |                |
| 16 | 4.97  | 11.95 | 1.25 | 1.36  | 5.09  | 84.67  |                |
| 17 | 4.39  | 11.50 | 1.72 | 9.95  | 13.03 | 100.03 |                |
| 18 | 3.78  | 11.55 | 1.98 | 9.97  | 10.44 | 126.00 |                |
| 19 | 3.63  | 11.40 | 2.14 | 1.80  | 6.84  | 113.13 |                |
| 20 | 4.08  | 11.55 | 2.06 | 12.35 | 13.13 | 86.93  |                |
| 21 | 4.02  | 11.25 | 2.85 | 13.72 | 16.72 | 87.61  |                |
| 22 | 4.34  | 11.20 | 2.29 | 3.55  | 10.12 | 73.38  |                |
| 23 | 4.79  | 10.85 | 1.10 | 1.50  | 3.67  | 54.41  |                |
| 24 | 4.85  | 10.20 | 0.92 | 9.67  | 10.84 | 61.87  |                |
| 25 | 4.62  | 10.15 | 0.49 | 9.91  | 14.99 | 68.64  |                |
| 26 | 2.56  | 7.64  | 0.45 | 0.66  | 2.44  | 77.45  |                |
| 27 | 1.52  | 6.64  | 0.71 | 1.15  | 7.55  | 59.61  |                |
| 28 | 3.84  | 9.75  | 1.03 | 1.69  | 4.36  | 67.74  |                |
| 29 | 3.73  | 12.43 | 0.70 | 1.03  | 3.96  | 71.58  |                |
| 1  | 1.17  | 7.53  | 0.09 | 1.55  | 3.55  | 78.58  |                |
| 2  | 2.19  | 8.95  | 0.08 | 2.72  | 7.87  | 58.25  |                |
| 3  | 2.23  | 10.37 | 0.10 | 3.71  | 9.20  | 97.09  |                |
| 4  | 2.29  | 6.79  | 0.12 | 3.51  | 9.26  | 115.61 |                |
| 5  | 1.34  | 6.10  | 0.12 | 1.06  | 5.30  | 89.64  | Yitong River   |
| 6  | 1.84  | 7.95  | 0.10 | 2.51  | 9.09  | 87.84  |                |
| 7  | 1.29  | 9.68  | 0.10 | 1.25  | 5.98  | 71.12  |                |
| 8  | 2.11  | 8.22  | 0.09 | 4.00  | 10.47 | 104.55 |                |
| 9  | 2.37  | 7.52  | 0.11 | 2.23  | 5.14  | 69.32  |                |
| 10 | 1.55  | 8.72  | 0.09 | 1.84  | 5.08  | 69.32  |                |
| 1  | 1.07  | 8.78  | 0.08 | 2.48  | 7.12  | 84.22  | Yongchun River |
| 2  | 1.42  | 5.25  | 0.05 | 2.94  | 4.06  | 87.84  |                |
| 3  | 0.41  | 5.71  | 0.07 | 3.13  | 5.93  | 118.1  |                |
| 4  | 0.96  | 6.58  | 0.07 | 2.85  | 6.60  | 96.72  |                |
| 5  | 2.07  | 8.32  | 0.06 | 2.29  | 4.07  | 53.96  |                |
| 6  | 0.06  | 9.24  | 0.10 | 2.67  | 4.01  | 114.48 |                |
| 7  | 0.24  | 7.47  | 0.09 | 2.90  | 6.13  | 116.29 |                |

|    |      |      |      |      |      |        |
|----|------|------|------|------|------|--------|
| 8  | 0.15 | 8.36 | 0.09 | 2.79 | 3.52 | 115.39 |
| 9  | 1.57 | 8.55 | 0.07 | 2.39 | 4.70 | 69.09  |
| 10 | 0.69 | 6.14 | 0.07 | 2.99 | 4.34 | 107.41 |

**Table S4.** Other physicochemical properties of overlying water and sediment in six rivers of Changchun Urban

| Sample | DO<br>(mg/L) | Eh<br>(mV) | T<br>(°C) | COD<br>(mg/L) | pH <sub>w</sub> | OM<br>(%) | pH <sub>s</sub> | River          |
|--------|--------------|------------|-----------|---------------|-----------------|-----------|-----------------|----------------|
| 1      | 13.60        | 141.50     | 7.20      | 8.50          | 8.40            | 0.08      | 8.52            | Chuan Lake     |
| 2      | 11.25        | 153.00     | 6.60      | 10.00         | 8.31            | 0.12      | 7.95            |                |
| 3      | 5.49         | 181.50     | 5.40      | 59.00         | 8.04            | 0.09      | 7.52            |                |
| 4      | 7.89         | 165.50     | 5.90      | 29.50         | 8.36            | 0.12      | 7.86            |                |
| 5      | 13.10        | 141.50     | 7.00      | 15.00         | 8.54            | 0.08      | 8.08            |                |
| 6      | 11.43        | 151.71     | 6.40      | 16.86         | 8.41            | 0.10      | 8.02            |                |
| 7      | 2.57         | 179.50     | 4.45      | 82.00         | 8.19            | 0.06      | 7.28            |                |
| 8      | 17.17        | 153.00     | 5.65      | 8.00          | 8.26            | 0.08      | 8.07            |                |
| 9      | 15.45        | 149.50     | 6.15      | 10.00         | 8.30            | 0.09      | 8.13            |                |
| 10     | 10.19        | 163.00     | 8.70      | 22.50         | 8.50            | 0.07      | 8.22            |                |
| 11     | 10.35        | 172.00     | 7.30      | 43.67         | 8.39            | 0.08      | 8.32            |                |
| 12     | 15.93        | 145.33     | 6.43      | 10.33         | 8.37            | 0.08      | 8.26            |                |
| 13     | 10.38        | 161.62     | 6.24      | 32.31         | 8.34            | 0.09      | 7.96            |                |
| 1      | 9.67         | 162.00     | 8.35      | 49.50         | 8.04            | 0.07      | 7.89            | Jingshui River |
| 2      | 13.05        | 153.50     | 4.70      | 90.00         | 7.86            | 0.10      | 7.72            |                |
| 3      | 15.72        | 100.50     | 4.85      | 65.50         | 8.05            | 0.12      | 7.28            |                |
| 4      | 16.67        | 45.50      | 4.95      | 35.00         | 8.22            | 0.11      | 7.61            |                |
| 5      | 17.44        | 66.00      | 5.85      | 66.50         | 8.12            | 0.09      | 7.92            |                |
| 6      | 13.11        | 129.50     | 9.40      | 56.50         | 8.12            | 0.07      | 7.75            |                |
| 7      | 14.27        | 109.50     | 6.35      | 60.50         | 8.07            | 0.09      | 7.69            |                |
| 8      | 13.88        | 170.50     | 8.45      | 67.50         | 8.06            | 0.11      | 7.42            |                |
| 9      | 11.50        | 92.00      | 4.75      | 47.50         | 8.03            | 0.09      | 7.75            |                |
| 10     | 18.21        | 107.00     | 4.90      | 77.50         | 8.06            | 0.12      | 7.58            |                |
| 1      | 10.96        | 267.50     | 6.50      | 23.50         | 7.60            | 0.04      | 7.74            | West Lake      |
| 2      | 9.56         | 261.50     | 10.95     | 16.00         | 7.41            | 0.05      | 7.50            |                |
| 3      | 10.34        | 227.00     | 12.10     | 14.50         | 7.94            | 0.06      | 7.77            |                |
| 4      | 11.03        | 149.00     | 7.05      | 16.50         | 8.43            | 0.06      | 7.80            |                |
| 5      | 10.58        | 121.00     | 6.80      | 27.50         | 8.09            | 0.05      | 7.86            |                |
| 6      | 10.02        | 135.00     | 10.65     | 32.50         | 8.03            | 0.04      | 7.83            |                |
| 7      | 8.46         | 132.50     | 12.70     | 29.50         | 7.93            | 0.04      | 7.57            |                |
| 8      | 8.32         | 130.50     | 12.30     | 26.50         | 7.90            | 0.03      | 7.93            |                |
| 9      | 8.31         | 127.50     | 12.60     | 24.00         | 7.86            | 0.05      | 7.96            |                |
| 10     | 9.72         | 199.50     | 9.75      | 27.50         | 7.67            | 0.06      | 7.83            |                |
| 1      | 15.87        | 170.90     | 6.00      | 21.50         | 8.39            | 0.05      | 7.60            | Xinkai River   |
| 2      | 13.45        | 168.35     | 5.75      | 19.50         | 8.13            | 0.04      | 7.53            |                |
| 3      | 12.80        | 146.50     | 5.80      | 33.50         | 8.16            | 0.04      | 7.82            |                |
| 4      | 11.37        | 122.65     | 6.60      | 463.50        | 9.16            | 0.04      | 8.55            |                |
| 5      | 9.99         | 105.00     | 6.65      | 816.50        | 9.79            | 0.05      | 8.57            |                |

|    |       |        |       |        |       |      |      |                |
|----|-------|--------|-------|--------|-------|------|------|----------------|
| 6  | 8.68  | 136.15 | 5.50  | 415.50 | 8.97  | 0.16 | 8.15 |                |
| 7  | 11.48 | 154.15 | 5.55  | 64.00  | 8.37  | 0.34 | 8.12 |                |
| 8  | 13.47 | 146.45 | 5.75  | 41.00  | 8.31  | 0.26 | 8.17 |                |
| 9  | 10.36 | 150.60 | 6.00  | 35.00  | 8.29  | 0.17 | 8.19 |                |
| 10 | 9.40  | 150.00 | 6.35  | 35.00  | 8.29  | 0.14 | 8.05 |                |
| 11 | 10.70 | 146.40 | 6.35  | 32.50  | 8.27  | 0.11 | 8.01 |                |
| 12 | 11.63 | 149.05 | 6.65  | 32.50  | 8.28  | 0.14 | 8.09 |                |
| 13 | 11.59 | 155.55 | 7.10  | 34.50  | 8.44  | 0.06 | 8.24 |                |
| 14 | 10.90 | 153.65 | 7.50  | 40.00  | 8.44  | 0.03 | 9.17 |                |
| 15 | 10.87 | 154.90 | 8.00  | 39.50  | 8.47  | 0.03 | 8.95 |                |
| 16 | 11.03 | 160.20 | 9.35  | 28.50  | 8.52  | 0.04 | 7.87 |                |
| 17 | 10.71 | 160.55 | 10.15 | 22.50  | 8.43  | 0.06 | 7.77 |                |
| 18 | 10.35 | 162.90 | 10.75 | 23.50  | 8.45  | 0.06 | 7.96 |                |
| 19 | 10.38 | 166.45 | 10.40 | 25.50  | 8.32  | 0.05 | 8.06 |                |
| 20 | 10.69 | 168.40 | 9.15  | 26.50  | 8.25  | 0.06 | 7.89 |                |
| 21 | 10.96 | 172.05 | 8.95  | 27.00  | 8.30  | 0.05 | 7.91 |                |
| 22 | 11.35 | 182.05 | 9.00  | 28.50  | 8.29  | 0.05 | 7.85 |                |
| 23 | 11.31 | 188.25 | 9.25  | 28.50  | 8.25  | 0.05 | 7.76 |                |
| 24 | 11.29 | 189.30 | 8.90  | 25.00  | 8.22  | 0.04 | 7.91 |                |
| 25 | 11.19 | 188.65 | 8.50  | 23.00  | 8.22  | 0.05 | 7.99 |                |
| 26 | 10.97 | 173.70 | 7.75  | 31.50  | 8.24  | 0.05 | 8.29 |                |
| 27 | 11.07 | 167.60 | 5.35  | 32.00  | 8.30  | 0.05 | 8.30 |                |
| 28 | 9.74  | 168.90 | 6.90  | 71.00  | 8.31  | 0.05 | 7.90 |                |
| 29 | 13.16 | 160.00 | 8.05  | 72.00  | 8.41  | 0.06 | 7.73 |                |
| 1  | 9.11  | 137.50 | 11.20 | 27.50  | 8.13  | 0.06 | 8.01 |                |
| 2  | 8.75  | 108.00 | 11.80 | 27.00  | 8.14  | 0.08 | 7.96 |                |
| 3  | 9.06  | 115.50 | 12.55 | 33.00  | 8.08  | 0.13 | 7.78 |                |
| 4  | 9.21  | 74.00  | 13.15 | 32.50  | 8.05  | 0.16 | 7.72 |                |
| 5  | 9.45  | 105.00 | 11.80 | 32.00  | 8.01  | 0.09 | 7.49 |                |
| 6  | 9.11  | 108.00 | 12.10 | 30.40  | 8.08  | 0.11 | 7.79 | Yitong River   |
| 7  | 9.30  | 146.50 | 11.20 | 32.50  | 8.04  | 0.06 | 7.55 |                |
| 8  | 8.87  | 106.50 | 12.55 | 28.00  | 8.17  | 0.14 | 8.24 |                |
| 9  | 9.10  | 75.50  | 12.40 | 31.50  | 8.02  | 0.11 | 7.45 |                |
| 10 | 9.05  | 130.67 | 11.40 | 29.00  | 8.10  | 0.07 | 7.84 |                |
| 1  | 9.39  | 117.50 | 14.00 | 46.00  | 9.36  | 0.07 | 7.96 |                |
| 2  | 9.13  | 123.00 | 11.55 | 37.00  | 9.21  | 0.07 | 7.68 |                |
| 3  | 10.24 | 160.50 | 11.25 | 43.00  | 8.57  | 0.09 | 7.99 |                |
| 4  | 9.58  | 133.67 | 12.27 | 42.00  | 9.04  | 0.08 | 7.87 |                |
| 5  | 8.28  | 80.00  | 14.30 | 40.00  | 10.00 | 0.06 | 7.65 | Yongchun River |
| 6  | 10.50 | 155.00 | 13.70 | 52.00  | 8.72  | 0.09 | 8.26 |                |
| 7  | 10.37 | 157.75 | 12.48 | 47.50  | 8.64  | 0.09 | 8.12 |                |
| 8  | 10.43 | 156.38 | 13.09 | 49.75  | 8.68  | 0.09 | 8.19 |                |



|    |      |        |       |       |      |      |      |
|----|------|--------|-------|-------|------|------|------|
| 9  | 8.84 | 98.75  | 14.15 | 43.00 | 9.68 | 0.07 | 7.80 |
| 10 | 9.91 | 147.08 | 11.76 | 42.50 | 8.80 | 0.08 | 7.93 |

DO: dissolved oxygen; Eh: oxidation-reduction potential; T: temperature; COD: Chemical oxygen demand; pH<sub>w</sub>: pH value of overlying water; OM: organic matter in sediment; pH<sub>s</sub>: pH value of sediment.

**Table S5.** Classification of samples based on five discriminant functions

| Initial grouping  |   | Prediction grouping |     |    |      |    |     | Total |
|-------------------|---|---------------------|-----|----|------|----|-----|-------|
|                   |   | 1                   | 2   | 3  | 4    | 5  | 6   |       |
| Count             | 1 | 13                  | 0   | 0  | 0    | 0  | 0   | 13    |
|                   | 2 | 0                   | 10  | 0  | 0    | 0  | 0   | 10    |
|                   | 3 | 1                   | 0   | 9  | 0    | 0  | 0   | 10    |
|                   | 4 | 2                   | 0   | 0  | 27   | 0  | 0   | 29    |
|                   | 5 | 0                   | 0   | 1  | 0    | 9  | 0   | 10    |
|                   | 6 | 0                   | 0   | 0  | 0    | 0  | 10  | 10    |
| Percentage<br>(%) | 1 | 100                 | 0   | 0  | 0    | 0  | 0   | 100   |
|                   | 2 | 0                   | 100 | 0  | 0    | 0  | 0   | 100   |
|                   | 3 | 10                  | 0   | 90 | 0    | 0  | 0   | 100   |
|                   | 4 | 6.9                 | 0   | 0  | 93.1 | 0  | 0   | 100   |
|                   | 5 | 0                   | 0   | 10 | 0    | 90 | 0   | 100   |
|                   | 6 | 0                   | 0   | 0  | 0    | 0  | 100 | 100   |

Note: 95.1% of the initial grouping cases were correctly classified.

**Table S6.** The eigenvalue of canonical discriminate function

| Function | Eigenvalue         | VC%  | Cumulative VC % | Correlation |
|----------|--------------------|------|-----------------|-------------|
| 1        | 8.076 <sup>a</sup> | 41.3 | 41.3            | 0.943       |
| 2        | 6.732 <sup>a</sup> | 34.4 | 75.7            | 0.933       |
| 3        | 2.668 <sup>a</sup> | 13.6 | 89.3            | 0.853       |
| 4        | 1.670 <sup>a</sup> | 8.5  | 97.9            | 0.791       |
| 5        | 0.420 <sup>a</sup> | 2.1  | 100             | 0.544       |

a: The first five discriminant functions are used in the analysis. VC: variance contribution

**Table S7.** Classification standard of ammonia nitrogen (NH<sub>3</sub>-N), total nitrogen (TN) and total phosphorus (TP) for surface water in the environmental quality standard GB3838-2002 of the People's Republic of China

| Classification              | I    | II  | III | IV  | V   |
|-----------------------------|------|-----|-----|-----|-----|
| NH <sub>3</sub> -N (mg/L) ≤ | 0.15 | 0.5 | 1   | 1.5 | 2   |
| TN (mg/L) ≤                 | 0.2  | 0.5 | 1   | 1.5 | 2   |
| TP (mg/L) ≤                 | 0.02 | 0.1 | 0.2 | 0.3 | 0.4 |
